# Supplementary material for: GC/MS Analysis, Cytotoxicity, and Antimicrobial Properties of Six Moroccan Essential Oils Traditionally Used for COVID-19 Prevention
Source: Research Square preprint supplement (doi:10.21203/rs.3.rs-6406454/v1), 2025-04-10
Supplement: Supplementary file 1 [file db0945c62b9df81ada7254d0.docx]

**GC/MS Analysis, Cytotoxicity, and Antimicrobial Properties of Six Moroccan Essential Oils Traditionally Used for COVID-19 Prevention**

Houda Zaher1,2,3*, José Francisco Quílez del Moral2, Sanae Lemrabet3, Azucena Gonzalez-Coloma4, Bouchaib Bencharki1

1Agri-Food and Health Laboratory (AFHL), Faculty of Sciences and Techniques, Hassan First University, Settat, Morocco

2 Department of Organic Chemistry, Institute of Biotechnology, University of Granada, Granada, Spain

3Virology Department, National Institute of Hygiene, Ministry of Health, Rabat, Morocco

4Institute of Agricultural Sciences, CSIC, Madrid, Spain

*Correspondence should be addressed to Houda Zaher at: **zaherhouda@gmail.com**

**Table 1.** Chemical composition of *Artemisia absinthium*

| Ret. Time | % Area | Compound | % similarity |
| --- | --- | --- | --- |
| 4,470 | 0.64 | .alpha.-pipene |  |
| 4,779 | 0.88 | Camphene |  |
| 5,109 | 1.64 | Sabinene |  |
| 5,291 | 2.58 | .beta.-Myrcene |  |
| 5,916 | 0.64 | .ALPHA. TERPINENE |  |
| 6,083 | 0.74 | PARA CYMENE |  |
| 6,166 | 0.48 | LIMONENE |  |
| 6,273 | 0.41 | 1,8-Cineole |  |
| 6,740 | 1.32 | .gamma.-Terpinene |  |
| 7,038 | 1.54 | trans Sabinene hydrate |  |
| 7,331 | 0.30 | TERPINOLENE |  |
| 7,566 | 1.06 | Linalool |  |
| 7,727 | 0.43 | trans Sabinene hydrate |  |
| 7,883 | 1.67 | .BETA.-THUJONE |  |
| 8,153 | 29.02 | .ALPHA.-THUJONE |  |
| 8,262 | 0.20 | 1-TERPINEOL |  |
| 8,519 | 0.26 | 3-Thujanol, (1S,3S,4S,5R)-(+)- |  |
| 8,600 | 0.16 | Sabinyl acetate |  |
| 8,670 | 0.12 | 1-TERPINEOL |  |
| 8,771 | 0.15 | (1R)-cis-Verbenol |  |
| 8,920 | 24.34 | CAMPHOR |  |
| 9,433 | 0.45 | L-Borneol |  |
| 9,523 | 0.63 | (-)-cis-Myrtanol |  |
| 9,578 | 3.68 | (-)-4-Terpineol |  |
| 9,903 | 0.75 | .ALPHA. TERPINEOL |  |
| 10,176 | 0.17 | 5-Heptenoic acid, 2,6-dimethyl-2-vinyl- | 79 |
| 11,878 | 0.31 | METHYLBENZOATE |  |
| 12,013 | 0.27 | Thymol |  |
| 14,083 | 0.32 | .alpha.-Copaene |  |
| 14,563 | 0.54 | METHYL EUGENOL |  |
| 15,080 | 0.20 | .beta.-Ylangene |  |
| 15,147 | 1.23 | Caryophyllene |  |
| 15,351 | 0.15 | (1R,2S,6S,7S,8S)-8-Isopropyl-1-methyl-3-methylenetricyclo[4.4.0.02,7]decane-rel- |  |
| 15,955 | 0.15 | .ALPHA.-HUMULENE |  |
| 16,504 | 2.65 | GERMACRENE-D |  |
| 17,111 | 1.52 | 3,6-Dihydrochamazulene |  |
| 17,222 | 0.25 | .gamma.-Muurolene |  |
| 17,362 | 0.12 | 3,6-Dihydrochamazulene | 84 |
| 17,781 | 0.55 | Cyclohexane, 1-methyl-2,4-bis(1-methylethenyl)-, (1.alpha.,2.beta.,4.beta.)- | 86 |
| 17,898 | 1.53 | Elemol |  |
| 18,606 | 0.14 | Spathulenol | 87 |
| 18,750 | 0.59 | CARYOPHYLLENE OXIDE |  |
| 19,192 | 0.39 | Cycloheptane, 4-methylene-1-methyl-2-(2-methyl-1-propen-1-yl)-1-vinyl- | 87 |
| 19,366 | 1.21 | 3,6-Dihydrochamazulene | 86 |
| 19,642 | 0.29 | Benzene, (2-ethyl-4-methyl-1,3-pentadienyl)-, (E)- | 69 |
| 19,723 | 0.15 | .gamma.-Eudesmol | 89 |
| 19,806 | 0.20 | .alpha.-longipinene | 79 |
| 19,922 | 0.70 | .alpha.-Patchoulene | 81 |
| 20,177 | 0.27 | .alpha.-Cadinol | 75 |
| 20,237 | 0.24 | .beta.-Eudesmol | 90 |
| 20,787 | 0.13 | 3-(p-Ethylphenyl)adamantanol-1 | 60 |
| 21,772 | 6.92 | Chamazulene |  |
| 26,180 | 2.18 | Arborescin | 84 |
| 26,359 | 0.21 | (1R,4R,5S)-1,8-Dimethyl-4-(prop-1-en-2-yl)spiro[4.5]dec-7-ene | 86 |
| 26,491 | 2.14 | geranyl-.alpha.-terpinene | 88 |

**Table 2.** Chemical composition of *Eucalypthus globulus*

| Ret. Time | % Area | Compound | % similarity |
| --- | --- | --- | --- |
| 4,311 | 0.2 | alpha.-Thujene |  |
| 4,473 | 3.6 | d-.alpha.-Pinene |  |
| 5,250 | 0.18 | .DELTA.3-Carene |  |
| 5,293 | 0.21 | .BETA.-MYRCENE |  |
| 5,727 | 0.25 | .alpha.-phellandrene |  |
| 6,086 | 6.29 | p-Cymene |  |
| 6,169 | 1.26 | LIMONENE |  |
| 6,241 | 4.2 | .beta.-Phellandrene |  |
| 6,277 | 4.52 | 1,8-Cineole |  |
| 6,743 | 0.58 | .gamma.-Terpinene |  |
| 7,008 | 0.06 | Linalool oxide |  |
| 7,344 | 0.09 | trans-Ocimenol |  |
| 7,567 | 1.02 | Linalool |  |
| 8,181 | 0.26 | Fenchol |  |
| 8,261 | 0.34 | (E)-p-2-Menthen-1-ol |  |
| 8,332 | 0.22 | alpha.-Campholenal |  |
| 8,663 | 0.29 | p-menth-2-en-1-ol | 87 |
| 8,713 | 0.61 | Sabinyl acetate | 88 |
| 9,436 | 0.97 | ENDO-BORNEOL |  |
| 9,580 | 2.33 | 4-TERPINEOL |  |
| 9,710 | 0.25 | p-Cymen-8-ol |  |
| 9,810 | 1.82 | Crypton |  |
| 9,909 | 3.95 | .ALPHA. TERPINEOL |  |
| 11,091 | 0.36 | p-Cumic aldehyde |  |
| 11,941 | 0.51 | phellandral |  |
| 12,232 | 0.91 | Carvacrol |  |
| 13,024 | 0.13 | Bicycloelemene |  |
| 13,085 | 0.12 | .delta.-Elemene |  |
| 13,362 | 0.12 | .alpha.-Copaene | 83 |
| 13,541 | 0.24 | m-Eugenol |  |
| 13,963 | 0.1 | .alpha.-amorphene | 88 |
| 14,088 | 1.08 | Copaene |  |
| 14,348 | 0.23 | .beta.-elemene |  |
| 14,827 | 0.37 | .alpha.-Gurjunene |  |
| 15,154 | 7.33 | trans-Caryophyllene |  |
| 15,568 | 0.86 | (+)-AROMADENDRENE |  |
| 15,727 | 0.5 | Bicyclo[4.3.0]nonane, 4,5-dimethyl-1-(1-hydroxy-2-propyl)-5-(3-methyl-2-pentenoyl)- | 65 |
| 15,967 | 0.94 | .ALPHA.-HUMULENE |  |
| 16,059 | 2.39 | NEOALLOOCIMENE |  |
| 16,697 | 0.89 | .beta.-Guaiene | 80 |
| 16,820 | 0.49 | VALENCENE | 88 |
| 16,939 | 0.81 | .beta.-Bisabolene | 89 |
| 17,228 | 0.67 | .DELTA.-CADINENE |  |
| 18,487 | 0.5 | (-)-Globulol |  |
| 18,624 | 15 | Spathulenol | 87 |
| 18,773 | 7.67 | CARYOPHYLLENE OXIDE |  |
| 19,012 | 2.23 | Viridiflorol |  |
| 19,093 | 0.32 | geranyl-.alpha.-terpinene | 77 |
| 19,164 | 1.14 | Isoleptospermone | 89 |
| 19,228 | 1.08 | cis-Eudesm-6-en-11-ol | 82 |
| 19,283 | 0.63 | Isospathulenol | 83 |
| 19,592 | 1.03 | cis-Eudesm-6-en-11-ol | 83 |
| 19,726 | 1.59 | Aromadendrane-4,10-diol | 87 |
| 19,883 | 0.79 | Alloaromadendrene | 85 |
| 19,998 | 0.58 | Torreyol | 83 |
| 20,089 | 0.32 | Arctiol | 81 |
| 20,183 | 0.59 | .alpha.-Cadinol | 88 |
| 20,258 | 0.68 | .beta.-Eudesmol | 69 |
| 20,327 | 0.19 | Neointermedeol | 82 |
| 20,641 | 0.37 | Ledene | 77 |
| 21,172 | 7.52 | Farnesol |  |
| 21,632 | 0.51 | trans, trans-Farnesal |  |
| 21,791 | 1.18 | Valerenal | 86 |
| 22,014 | 0.21 | (2E,6E,10E)-3,7,11,15-Tetramethylhexadeca-2,6,10,14-tetraen-1-yl formate |  |
| 22,188 | 2.15 | (1S,4R,5S)-1-Methyl-4-(prop-1-en-2-yl)spiro[4.5]dec-7-ene-8-carbaldehyde | 87 |
| 23,331 | 0.51 | FARNESYL ACETATE 3 |  |
| 23,478 | 0.28 | Pentafluorobenzoic acid, tridec-2-ynyl ester | 70 |

**Table 3.** Chemical composition of *thymus vulgaris*

| Ret. Time | % Area | Compound | % similarity |
| --- | --- | --- | --- |
| 4,311 | 0.73 | .alpha.-Thujene |  |
| 4,473 | 0.68 | .alpha.-pipene |  |
| 4,782 | 0.41 | Camphene |  |
| 5,127 | 1.78 | Amyl vinyl carbinol |  |
| 5,294 | 1.82 | .beta.-Myrcene |  |
| 5,433 | 0.12 | 3-Octanol |  |
| 5,772 | 0.16 | 3-Carene |  |
| 5,920 | 1.28 | .ALPHA. TERPINENE |  |
| 6,099 | 25.87 | p-Cymene |  |
| 6,172 | 0.62 | LIMONENE |  |
| 6,279 | 2.39 | 1,8-Cineole |  |
| 6,746 | 7.21 | .gamma.-Terpinene |  |
| 7,041 | 0.11 | trans Sabinene hydrate |  |
| 7,340 | 0.16 | (+)-4-Carene |  |
| 7,479 | 0.13 | Cymenene |  |
| 7,568 | 3.34 | Linalool |  |
| 8,263 | 0.12 | 1-TERPINEOL |  |
| 9,438 | 2.26 | L-Borneol |  |
| 9,582 | 2.03 | 4-TERPINEOL |  |
| 9,708 | 0.23 | p-Cymen-8-ol |  |
| 9,909 | 0.62 | .ALPHA. TERPINEOL |  |
| 10,812 | 1.41 | Isothymol methyl ether |  |
| 11,547 | 0.18 | Citral |  |
| 11,795 | 1.34 | Thymol |  |
| 12,053 | 33.33 | Thymol |  |
| 12,246 | 5.23 | Carvacrol |  |
| 14,081 | 0.17 | .alpha.-Copaene | 83 |
| 14,305 | 0.22 | .BETA. BOURBONENE |  |
| 15,155 | 1.44 | Caryophyllene |  |
| 15,353 | 0.17 | GERMACRENE-D | 87 |
| 15,999 | 0.42 | Butanoic acid, 2-methyl-, 3,7-dimethyl-2,6-octadienyl ester, (E)- |  |
| 16,313 | 0.27 | .gamma.-Muurolene | 94 |
| 16,825 | 0.16 | .alpha.-amorphene | 84 |
| 17,170 | 0.23 | .gamma.-Cadinene | 87 |
| 17,230 | 0.31 | .DELTA.-CADINENE |  |
| 17,357 | 0.12 | cis-Calamenene |  |
| 18,761 | 2.19 | CARYOPHYLLENE OXIDE |  |
| 19,590 | 0.24 | epi-.gamma.-Eudesmol |  |
| 19,895 | 0.14 | .gamma.-Muurolene | 90 |
| 20,499 | 0.25 | (-)-Globulol | 84 |
| 20,695 | 0.11 | .ALPHA.-BISABOLOL |  |

**Table 4.** Chemical composition of *Syzgium aromaticum*

| Ret. Time | % Area | Compound | % similarity |
| --- | --- | --- | --- |
| 9,900 | 0.17 | Methyl salicylate |  |
| 13,369 | 1.34 | .alpha.-Cubebene |  |
| 13,604 | 54.96 | Eugenol |  |
| 14,099 | 1.9 | .alpha.-Copaene |  |
| 15,172 | 29.18 | trans-Caryophyllene |  |
| 15,787 | 0.14 | Naphthalene, 1,2,3,4,4a,5-hexahydro-4,7-dimethyl-1-(1-methylethyl)-, (1S,4S,4aS) |  |
| 15,968 | 3.79 | .ALPHA.-HUMULENE |  |
| 16,066 | 0.09 | NEOALLOOCIMENE |  |
| 16,317 | 0.08 | .alpha.-amorphene |  |
| 16,511 | 0.15 | GERMACRENE-D |  |
| 16,783 | 0.63 | Farnesene |  |
| 17,115 | 5.41 | Eugenol acetate |  |
| 17,232 | 0.9 | .DELTA.-CADINENE |  |
| 17,363 | 0.27 | cis-Calamenene |  |
| 17,586 | 0.22 | Naphthalene, 1,2,3,4,4a,7-hexahydro-1,6-dimethyl-4-(1-methylethyl)- |  |
| 18,760 | 0.49 | CARYOPHYLLENE OXIDE |  |

**Table 5**. Chemical composition of *artemisia helba-alba*

| Ret. Time | % Area | Compound | % similarity |
| --- | --- | --- | --- |
| 4,653 | 1.41 | Cyclohexanebutanal, 2-methyl-3-oxo-, cis- | 83 |
| 4,733 | 0.28 | 4,4-DIMETHYLBUT-2-ENOLIDE |  |
| 5,292 | 0.06 | .beta.-Myrcene |  |
| 5,845 | 0.67 | 1,8-Cineole | 83 |
| 6,085 | 0.38 | PARA CYMENE |  |
| 6,140 | 1.41 | Decane, 2-cyclohexyl- | 82 |
| 6,275 | 0.66 | 1,8-Cineole |  |
| 6,406 | 0.24 | 2(3H)-Furanone, 5-ethenyldihydro-5-methyl- (CAS) 4-Methyl-4-vinylbutyrolactone |  |
| 6,594 | 1.17 | cis-Arbusculone |  |
| 6,996 | 1.07 | cis-Arbusculone |  |
| 7,351 | 0.36 | Ethyl 2-(5-methyl-5-vinyltetrahydrofuran-2-yl)propan-2-yl carbonate |  |
| 7,565 | 0.75 | Linalool |  |
| 7,665 | 0.77 | HOTRIENOL |  |
| 7,884 | 4.31 | .BETA.-THUJONE |  |
| 8,132 | 4.09 | Thujone |  |
| 8,256 | 0.27 | ISOPHORONE | 81 |
| 8,726 | 0.22 | p-Mentha-1(7),8(10)-dien-9-ol | 85 |
| 8,905 | 6.02 | (+)-2-Bornanone |  |
| 9,100 | 0.60 | cis-Chrysanthenol |  |
| 9,435 | 0.55 | L-Borneol |  |
| 9,579 | 0.42 | 4-TERPINEOL |  |
| 10,530 | 2.19 | Nordavanone |  |
| 11,254 | 0.97 | cis-Chrysanthenol acetate |  |
| 12,233 | 0.26 | Carvacrol |  |
| 13,543 | 0.30 | Isoeugenol | 81 |
| 14,086 | 0.40 | Copaene |  |
| 14,504 | 1.97 | CIS JASMONE |  |
| 14,735 | 1.31 | davana furan | 87 |
| 15,124 | 0.57 | 3aH-Cyclopentacycloocten-3a-ol, 1,2,3,4,7,8,9,9a-octahydro-1,5,8,8-tetramethyl-, [1R-(1.alpha.,3a.beta.,9a.alpha.)]- | 76 |
| 15,544 | 0.58 | (1RS,5RS,6RS,7RS)-2,2,6,7-tetramethyl-10-oxatricyclo[[5.2.1.0(!,6)]decan-5-ol | 74 |
| 15,720 | 2.13 | 2-Butyl-5-methyl-3-(2-methylprop-2-enyl)cyclohexanone | 76 |
| 15,810 | 0.21 | 2-Butyl-5-methyl-3-(2-methylprop-2-enyl)cyclohexanone | 75 |
| 15,883 | 2.49 | 2-Butyl-5-methyl-3-(2-methylprop-2-enyl)cyclohexanone | 77 |
| 16,135 | 0.86 | 3aH-Cyclopentacycloocten-3a-ol, 1,2,3,4,7,8,9,9a-octahydro-1,5,8,8-tetramethyl-, [1R-(1.alpha.,3a.beta.,9a.alpha.)]- | 75 |
| 16,363 | 4.21 | DAVANA ETHER 1 |  |
| 16,501 | 0.25 | GERMACRENE-D |  |
| 16,606 | 0.81 | 2-Butyl-5-methyl-3-(2-methylprop-2-enyl)cyclohexanone | 77 |
| 16,789 | 14.48 | DAVANA ETHER 1 |  |
| 16,962 | 0.22 | (2R,2'S,5S,5'S)-2,5'-Dimethyl-5-(prop-1-en-2-yl)-5'-vinylhexahydro-[2,2'-bifuran]-3(2H)-one |  |
| 17,197 | 8.86 | **Davana ether** |  |
| 17,313 | 0.40 | (2R,2'S,5S,5'S)-2,5'-Dimethyl-5-(prop-1-en-2-yl)-5'-vinylhexahydro-[2,2'-bifuran]-3(2H)-one |  |
| 17,474 | 1.46 | Artedouglasia oxide C |  |
| 17,607 | 0.63 | (2R,2'S,5S,5'S)-2,5'-Dimethyl-5-(prop-1-en-2-yl)-5'-vinylhexahydro-[2,2'-bifuran]-3(2H)-one |  |
| 17,691 | 0.60 | (2R,2'S,5S,5'S)-2,5'-Dimethyl-5-(prop-1-en-2-yl)-5'-vinylhexahydro-[2,2'-bifuran]-3(2H)-one |  |
| 17,903 | 0.29 | 2-Butenal, 2-methyl-4-(2,6,6-trimethyl-1-cyclohexen-1-yl)- | 67 |
| 17,965 | 0.51 | (S)-2,6,6-Trimethyl-2-((2S,5R)-5-methyl-5-vinyltetrahydrofuran-2-yl)-2H-pyran-3(6H)-one | 89 |
| 18,356 | 0.19 | (2R,2'S,5S,5'S)-2,5'-Dimethyl-5-(prop-1-en-2-yl)-5'-vinylhexahydro-[2,2'-bifuran]-3(2H)-one |  |
| 18,448 | 2.18 | Davanone |  |
| 18,610 | 2.91 | 1H-Cycloprop[e]azulen-7-ol, decahydro-1,1,7-trimethyl-4-methylene-, [1ar-(1a.alpha.,4a.alpha.,7.beta.,7a.beta.,7b.alpha.)]- | 88 |
| 18,755 | 1.36 | CARYOPHYLLENE OXIDE |  |
| 18,944 | 1.50 | 1-((1R,2R,3R)-2-(3-Isopropylfuran-2-yl)-3-methylcyclopentyl)ethanone | 69 |
| 19,146 | 2.10 | 3-Methyl-but-2-enoic acid, 1,7,7-trimethyl-bicyclo[2.2.1]hept-2-yl ester | 86 |
| 19,326 | 0.84 | Humulenol-II | 87 |
| 19,523 | 0.76 | (S,Z)-5-Hydroxy-6-methyl-2-((2S,5R)-5-methyl-5-vinyltetrahydrofuran-2-yl)hepta-4,6-dien-3-one | 72 |
| 19,564 | 1.00 | Humulenol-II | 80 |
| 19,800 | 0.63 | (S,Z)-5-Hydroxy-6-methyl-2-((2S,5R)-5-methyl-5-vinyltetrahydrofuran-2-yl)hepta-4,6-dien-3-one | 76 |
| 20,291 | 5.58 | 2-Propenal, 3-(2,6,6-trimethyl-1-cyclohexen-1-yl)- | 82 |
| 20,519 | 0.42 | Oxalic acid, butyl 1-menthyl ester | 75 |
| 20,656 | 3.21 | Davanone | 86 |
| 21,143 | 0.66 | cis-Hydroxydavanone |  |
| 22,264 | 0.29 | Artemisyl acetate |  |
| 23,462 | 0.24 | Hexahydrofarnesyl acetone |  |
| 27,864 | 0.19 | Eicosane |  |

**Table 6.** Chemical composition of *Santolina chamaecyparisses*

| Ret. Time | % Area | Compound | % similarity |
| --- | --- | --- | --- |
| 4,472 | 0.04 | .alpha.-PINENE |  |
| 4,781 | 0.09 | Camphene |  |
| 5,111 | 0.73 | Sabinene |  |
| 5,255 | 0.86 | Sabinene |  |
| 5,293 | 1.28 | .BETA.-MYRCENE |  |
| 5,354 | 0.91 | yomogi alcohol |  |
| 6,085 | 1.3 | PARA CYMENE |  |
| 6,169 | 0.44 | LIMONENE |  |
| 6,239 | 2.73 | .beta.-Phellandrene |  |
| 6,669 | 15.58 | Artemisia ketone |  |
| 6,746 | 0.32 | .gamma.-Terpinene |  |
| 7,124 | 0.81 | ARTEMISIA ALCOHOL |  |
| 7,334 | 0.24 | .ALPHA.-TERPINOLENE |  |
| 7,566 | 0.38 | Linalool |  |
| 8,803 | 1.67 | cis-Chrysanthemyl alcohol |  |
| 8,905 | 2.11 | (+)-2-Bornanone |  |
| 9,031 | 0.22 | Lavandulol |  |
| 9,432 | 1.17 | endo-Borneol |  |
| 9,518 | 0.19 | 1,8-menthadien-4-ol | 85 |
| 9,578 | 0.79 | 4-TERPINEOL |  |
| 9,708 | 0.35 | p-Cymen-8-ol |  |
| 9,809 | 0.79 | Cryptone |  |
| 11,093 | 0.13 | p-Cumic aldehyde |  |
| 11,942 | 0.25 | Phellandral | 89 |
| 13,026 | 0.38 | Elixene |  |
| 13,086 | 0.28 | .delta.-Elemene |  |
| 13,552 | 1.96 | .alpha.-Longipinene |  |
| 14,355 | 0.88 | .BETA. ELEMENE |  |
| 15,150 | 0.48 | Caryophyllene |  |
| 16,062 | 0.51 | NEOALLOOCIMENE | 86 |
| 16,117 | 0.25 | 2H-Cycloprop[c]indene-2,3(3ah)-dione, hexahydro-3a,7,7-trimethyl- | 77 |
| 16,288 | 1.55 | .gamma.-Curcumene |  |
| 16,376 | 4.81 | .alpha.-Curcumene |  |
| 16,464 | 1.4 | n-Pentadecanol |  |
| 16,505 | 1.79 | GERMACRENE-D |  |
| 16,635 | 0.52 | (2R,3R,6S)-6-Isopropyl-3-methyl-2-(prop-1-en-2-yl)-3-vinylcyclohexanone | 81 |
| 16,822 | 0.9 | (1S,2E,6E,10R)-3,7,11,11-Tetramethylbicyclo[8.1.0]undeca-2,6-diene | 91 |
| 17,100 | 0.32 | (2S,3S,6S)-6-Isopropyl-3-methyl-2-(prop-1-en-2-yl)-3-vinylcyclohexanone | 91 |
| 17,167 | 0.37 | (1R,2S,6S,7S,8S)-8-Isopropyl-1-methyl-3-methylenetricyclo[4.4.0.02,7]decane-rel- | 87 |
| 17,228 | 1.52 | .DELTA.-CADINENE |  |
| 17,312 | 0.48 | d-Nerolidol | 84 |
| 17,426 | 0.81 | NEROLIDOL | 78 |
| 17,735 | 1.49 | CARYOPHYLLENE OXIDE | 83 |
| 17,817 | 0.16 | 9-Methoxycalamenene | 67 |
| 17,895 | 0.79 | 9,12-Octadecadienal, dimethyl acetal (CAS) | 78 |
| 18,022 | 0.5 | NEROLIDOL |  |
| 18,100 | 0.4 | Longifolenaldehyde | 81 |
| 18,244 | 0.52 | LONGIFOLENALDEHYDE | 77 |
| 18,477 | 0.17 | Di-epi-.alpha.-cedrene-(I) | 81 |
| 18,611 | 4.41 | Spathulenol | 87 |
| 18,763 | 3.19 | Epizizanone | 85 |
| 18,967 | 0.2 | Salvial-4(14)-en-1-one | 86 |
| 19,060 | 0.4 | Vulgarone A | 80 |
| 19,157 | 1.46 | .beta.-Oplopenone | 85 |
| 19,216 | 1.82 | (+)-TRANS-CARAN-CIS-3-OL | 79 |
| 19,299 | 0.37 | Isolongifolene | 83 |
| 19,389 | 0.59 | Ylangenol | 77 |
| 19,553 | 0.53 | 2(3H)-Naphthalenone, 4,4a,5,6,7,8-hexahydro-4a,5-dimethyl-3-(1-methylethylidene)-, (4ar-cis)- | 80 |
| 19,624 | 0.83 | Isospathulenol | 86 |
| 19,713 | 0.18 | Isospathulenol | 76 |
| 19,787 | 0.3 | (2R,3R,4aR,5S)-2-Hydroxy-4a,5-dimethyl-3-(prop-1-en-2-yl)-3,4,4a,5,6,7-hexahydronaphthalen-1(2H)-one | 78 |
| 19,903 | 0.92 | .delta.-Cadinene | 88 |
| 19,998 | 2.77 | (2R,3R,4aR,5S,8aS)-2-Hydroxy-4a,5-dimethyl-3-(prop-1-en-2-yl)-2,3,4,4a,5,6-hexahydronaphthalen-1(8aH)-one | 79 |
| 20,123 | 18.15 | Longiverbenone |  |
| 20,289 | 0.62 | ((4aS,8S,8aR)-8-Isopropyl-5-methyl-3,4,4a,7,8,8a-hexahydronaphthalen-2-yl)methanol | 82 |
| 20,608 | 0.68 | Muurola-4,10(14)-dien-1.beta.-ol | 78 |
| 20,810 | 0.7 | (1R,7S,E)-7-Isopropyl-4,10-dimethylenecyclodec-5-enol | 85 |
| 20,935 | 0.57 | (1R,7S,E)-7-Isopropyl-4,10-dimethylenecyclodec-5-enol | 82 |
| 21,042 | 0.18 | trans-Sesquisabinene hydrate | 79 |
| 21,274 | 1.61 | ((4aS,8S,8aR)-8-Isopropyl-5-methyl-3,4,4a,7,8,8a-hexahydronaphthalen-2-yl)methanol | 82 |
| 21,441 | 0.72 | 6-Isopropenyl-4,8a-dimethyl-1,2,3,5,6,7,8,8a-octahydro-naphthalen-2-ol | 84 |
| 21,775 | 0.47 | Cycloheptane, 4-methylene-1-methyl-2-(2-methyl-1-propen-1-yl)-1-vinyl- | 81 |
| 22,009 | 1.69 | Elixene | 83 |
